# Supplementary material for: Organic Transistors Based on Highly Crystalline Donor–Acceptor π-Conjugated Polymer of Pentathiophene and Diketopyrrolopyrrole
Source: MDPI journal article supplement (doi:10.3390/molecules29020457), 2024-01-17
Supplement: s1 [file s1]

## Supplementary Material

**Figure S1.** Infrared spectra of polymers PDPP-5Th.

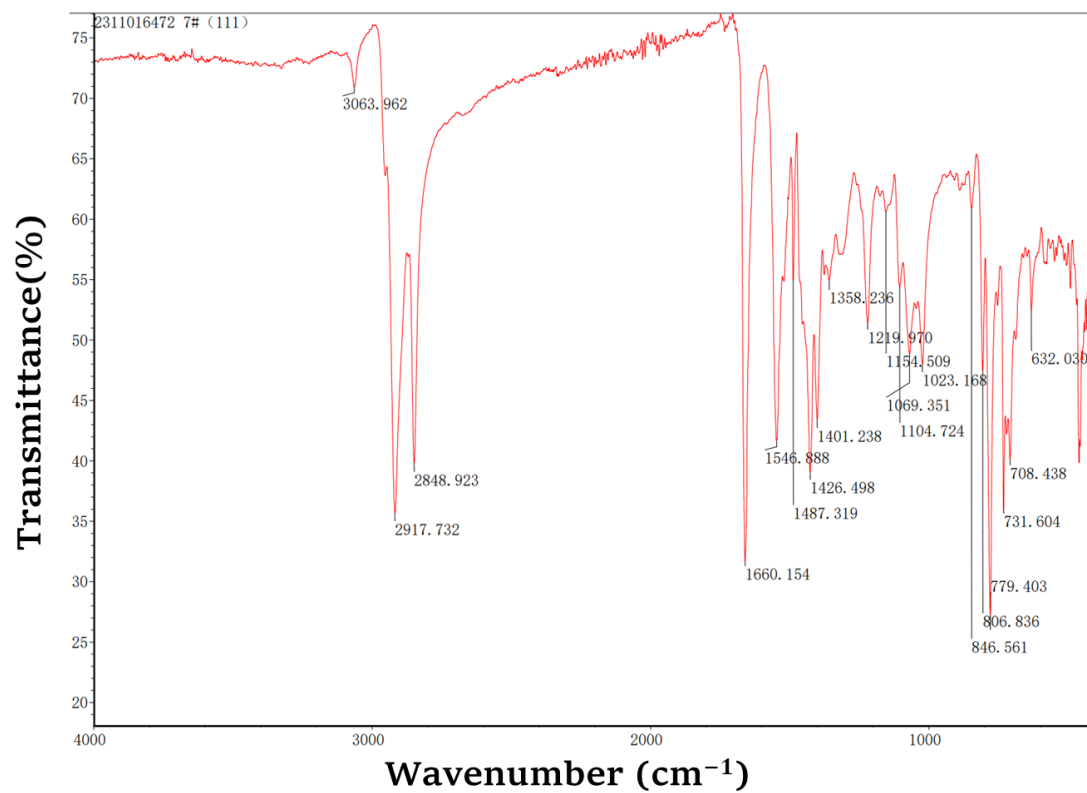

**Figure S2.** The thermal decomposition curve of PDPP-5Th.

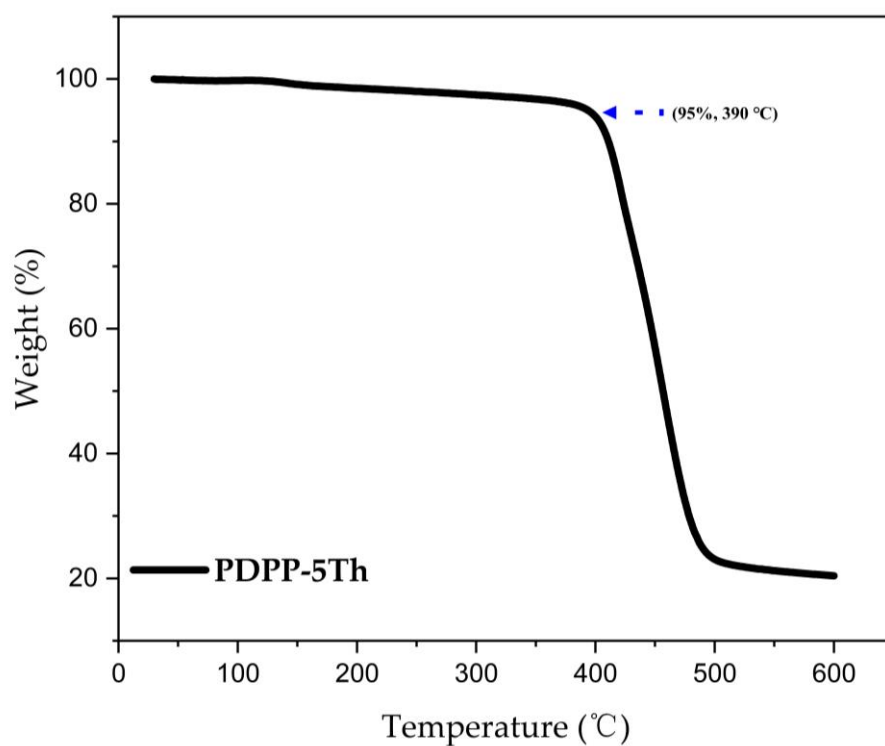

**Figure S3.** HOMO-1, HOMO-2, LUMO+1 and LUMO+2 map of the dimer of PDPP-5Th.

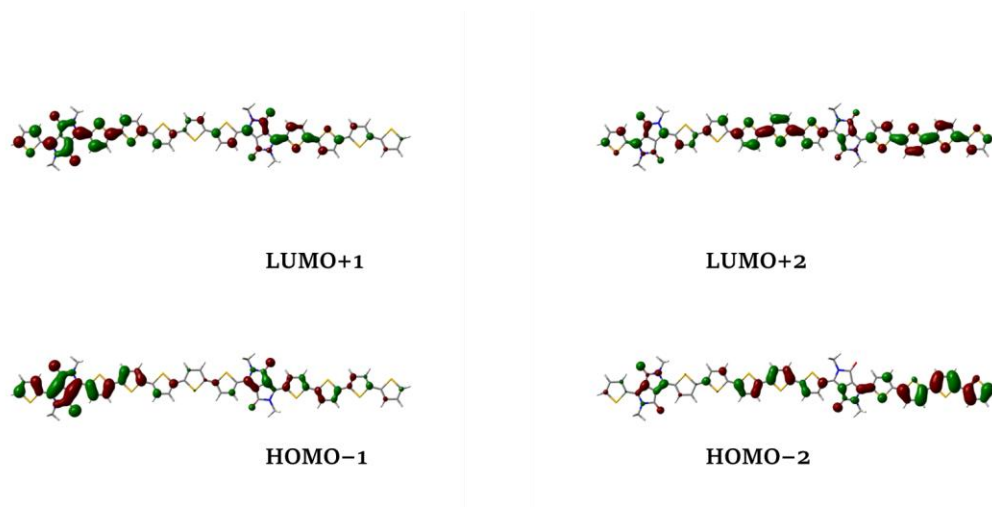

**Figure S4.** Thickness plot of the polymer film based on AFM measurements

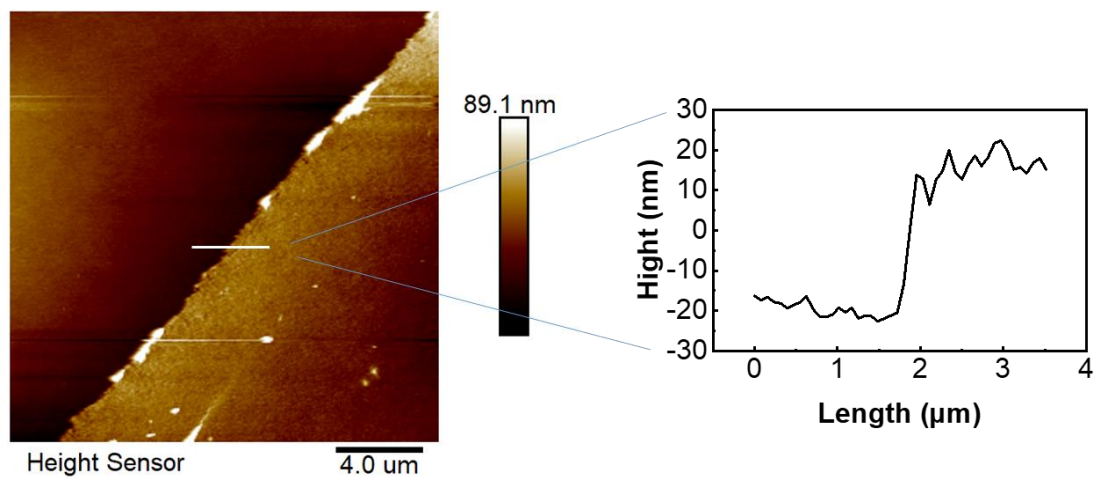

**Figure S5.** (top) Transfer and (bottom) output curves of conducting polymers at different annealing temperatures.

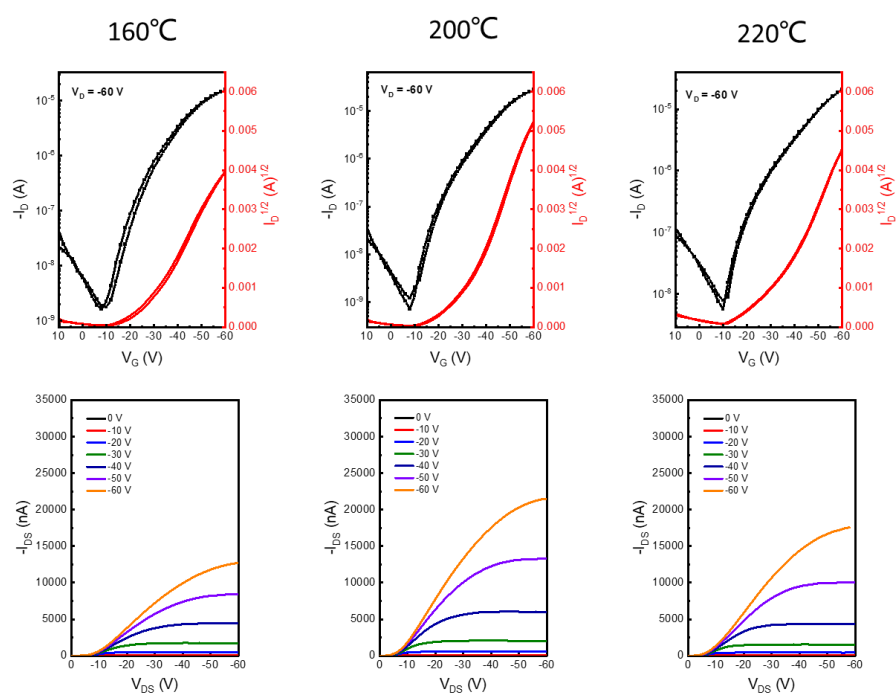

**Figure S6.** Three-dimensional view of polymer film under AFM testing.

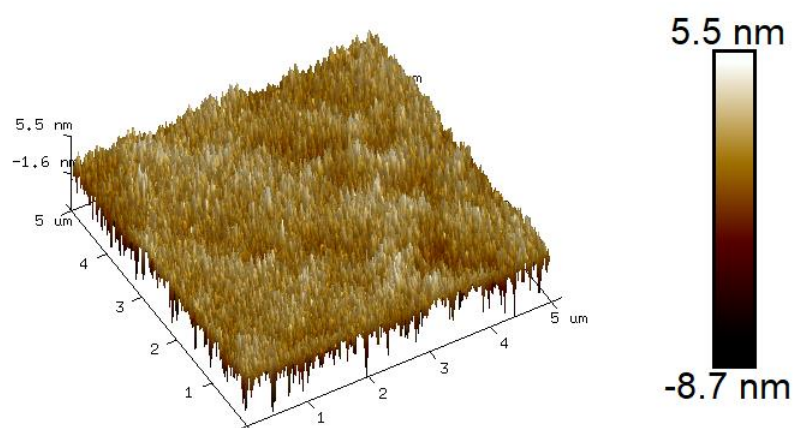

Height Sensor

**Table S1.** Spatial atomic coordinates of the dimer

|   |              |             |             |
|---|--------------|-------------|-------------|
| C | -19.15246900 | 0.93658000  | -0.00535800 |
| C | -18.14683600 | -0.03346300 | -0.00988800 |
| C | -16.87193500 | 0.60537600  | -0.00201600 |
| C | -17.07471900 | 2.02680200  | 0.00786500  |
| N | -18.50754400 | 2.18189300  | 0.00542500  |
| C | -17.94416300 | -1.45610500 | -0.01952900 |
| N | -16.51266300 | -1.61182900 | -0.01698600 |
| C | -15.86512100 | -0.36555300 | -0.00643300 |
| O | -16.28957400 | 3.00501700  | 0.01697600  |
| O | -18.72936000 | -2.43354000 | -0.02847700 |
| C | -14.45964300 | -0.13678100 | -0.00142800 |
| C | -20.56414900 | 0.70781200  | -0.01069300 |
| C | -19.09078700 | 3.51779200  | 0.01346700  |
| C | -15.92893600 | -2.94723500 | -0.02517900 |
| S | -21.83367700 | 2.02939500  | -0.00518100 |
| C | -23.11550900 | 0.77553100  | -0.01756300 |
| C | -22.59670400 | -0.48639500 | -0.02482300 |
| C | -21.17461100 | -0.53208500 | -0.02107900 |
| S | -13.18949500 | -1.45660500 | -0.00815400 |
| C | -11.88140500 | -0.19174000 | 0.00395400  |
| C | -12.43863800 | 1.07238800  | 0.01175200  |

|   |              |             |             |
|---|--------------|-------------|-------------|
| C | -13.84728200 | 1.10717300  | 0.00885700  |
| C | -10.51229300 | -0.58265900 | 0.00402000  |
| C | -9.95007300  | -1.84141000 | -0.00022700 |
| C | -8.53526500  | -1.86448400 | 0.00102900  |
| C | -7.93335800  | -0.62411100 | 0.00631600  |
| S | -9.20104700  | 0.68960800  | 0.01010900  |
| C | -6.55103000  | -0.27944700 | 0.00866700  |
| S | -5.28236100  | -1.59420200 | 0.00615600  |
| C | -3.97129000  | -0.32172000 | 0.01074700  |
| C | -4.53297600  | 0.93657000  | 0.01368000  |
| C | -5.94848300  | 0.95970000  | 0.01253300  |
| C | -2.60109300  | -0.71146500 | 0.01067700  |
| C | -2.04014400  | -1.97096100 | 0.01079400  |
| C | -0.62550600  | -1.99451800 | 0.01044800  |
| C | -0.02200400  | -0.75476300 | 0.01005700  |
| S | -1.29085100  | 0.55998100  | 0.01009300  |
| C | 1.35895200   | -0.40952300 | 0.00946900  |
| S | 2.62446400   | -1.71740200 | 0.01223900  |
| C | 3.93804900   | -0.44052300 | 0.00926400  |
| C | 3.36695000   | 0.82356600  | 0.00669300  |
| C | 1.95833000   | 0.83548100  | 0.00683500  |
| C | 5.33411600   | -0.71660300 | 0.00938900  |

|   |             |             |             |
|---|-------------|-------------|-------------|
| N | 5.94019100  | -1.98358800 | 0.01227700  |
| C | 7.37538700  | -1.87539300 | 0.01120300  |
| C | 7.62516600  | -0.46056400 | 0.00740700  |
| C | 6.37456700  | 0.22019000  | 0.00647900  |
| C | 8.66587200  | 0.47664900  | 0.00393400  |
| N | 8.05961800  | 1.74360300  | 0.00096000  |
| C | 6.62474900  | 1.63536600  | 0.00241900  |
| C | 8.68736800  | 3.05900800  | -0.00289000 |
| C | 5.31258500  | -3.29897500 | 0.01640600  |
| O | 5.87091900  | 2.63796400  | 0.00036300  |
| O | 8.12902000  | -2.87834800 | 0.01347400  |
| C | 10.06155800 | 0.20130800  | 0.00338400  |
| C | 10.63313700 | -1.06267300 | 0.00674500  |
| C | 12.04168700 | -1.07447900 | 0.00506400  |
| C | 12.64096800 | 0.17073900  | 0.00030600  |
| S | 11.37549100 | 1.47841700  | -0.00227400 |
| C | 14.02191000 | 0.51641600  | -0.00257500 |
| S | 15.29170500 | -0.79807800 | 0.00130000  |
| C | 16.60122400 | 0.47361300  | -0.00535000 |
| C | 16.04025100 | 1.73256800  | -0.00978400 |
| C | 14.62503600 | 1.75573600  | -0.00826600 |
| C | 17.97275600 | 0.08399900  | -0.00539000 |

|   |              |             |             |
|---|--------------|-------------|-------------|
| C | 18.53594200  | -1.17151600 | -0.00029600 |
| C | 19.95428500  | -1.19122500 | -0.00213800 |
| C | 20.55256800  | 0.04684300  | -0.00872800 |
| S | 19.28237900  | 1.35841100  | -0.01314500 |
| C | 21.93929400  | 0.39995700  | -0.01224400 |
| S | 23.21598100  | -0.90848600 | -0.00726100 |
| C | 24.49495100  | 0.36078400  | -0.01530200 |
| C | 23.96203600  | 1.61348200  | -0.02092600 |
| C | 22.53288200  | 1.63861600  | -0.01923200 |
| H | -18.25503000 | 4.21315300  | 0.02110800  |
| H | -19.69194700 | 3.69484600  | -0.87702600 |
| H | -19.69735800 | 3.68172400  | 0.90278600  |
| H | -15.32364700 | -3.11193700 | -0.91540400 |
| H | -15.32791800 | -3.12472900 | 0.86547300  |
| H | -16.76455700 | -3.64293700 | -0.03218300 |
| H | -24.14366500 | 1.08917300  | -0.01831000 |
| H | -23.21344600 | -1.37170700 | -0.03268000 |
| H | -20.59676200 | -1.44665700 | -0.02591700 |
| H | -11.83261900 | 1.96558600  | 0.01973500  |
| H | -14.42904600 | 2.01955000  | 0.01416300  |
| H | -10.55110500 | -2.73819200 | -0.00406300 |
| H | -7.96316900  | -2.77989100 | -0.00195600 |

|   |             |             |             |
|---|-------------|-------------|-------------|
| H | -3.93196600 | 1.83331100  | 0.01674400  |
| H | -6.51982700 | 1.87564600  | 0.01447500  |
| H | -2.64198600 | -2.86712300 | 0.01122900  |
| H | -0.05420700 | -2.91051300 | 0.01039400  |
| H | 3.97892900  | 1.71594400  | 0.00458100  |
| H | 1.38226900  | 1.74835200  | 0.00477800  |
| H | 9.29511300  | 3.20744900  | -0.89425300 |
| H | 7.87547700  | 3.78225300  | -0.00389600 |
| H | 9.29684300  | 3.21181400  | 0.88655400  |
| H | 6.12471900  | -4.02198200 | 0.01817000  |
| H | 4.70443800  | -3.44725900 | 0.90756600  |
| H | 4.70367400  | -3.45250800 | -0.87333900 |
| H | 10.02130200 | -1.95520400 | 0.01022300  |
| H | 12.61809500 | -1.98707500 | 0.00718600  |
| H | 16.64209300 | 2.62864100  | -0.01406900 |
| H | 14.05373800 | 2.67181300  | -0.01136800 |
| H | 17.93741300 | -2.07003100 | 0.00474900  |
| H | 20.52763500 | -2.10583700 | 0.00134300  |
| H | 25.52539400 | 0.05637100  | -0.01509200 |
| H | 24.56790700 | 2.50660600  | -0.02620500 |
| H | 21.95962500 | 2.55339000  | -0.02313100 |
